# Supplementary material for: Exploring the link between ruminal methane production and physiological resilience in Japanese Black cattle during fattening
Source: Research Square preprint supplement (doi:10.21203/rs.3.rs-5235475/v1), 2024-10-15
Supplement: Supplementary file 1 [file 6c2a174c29b85d83d8b042e2.docx]

**Table S2**. Significant Differences in methane emissions, rumen fermentation characteristics, blood metabolites, and amino acid levels between the HME and LME groups were identified using mixed model analysis.

| **Parameter** | **Emmean HME** | **Emmean LME** | **Fold Change** | **SEM** | **P-value** |
| --- | --- | --- | --- | --- | --- |
| **Rumen fermentation** | | | | | |
| CH4 (L/day) | 273.80 | 214.41 | 1.28 | 6.58 | <0.001 |
| CH4/DMI (L/day) | 37.20 | 28.84 | 1.29 | 1.01 | <0.001 |
| Ammonia (mg/dL) | 14.55 | 10.39 | 1.40 | 0.79 | 0.002 |
| C2/C3 | 2.81 | 2.38 | 1.18 | 0.09 | 0.009 |
| C3 (%) | 21.85 | 25.60 | −1.17 | 0.73 | 0.011 |
| C4 (%) | 14.78 | 11.58 | 1.28 | 0.53 | 0.014 |
| **Blood metabolites** | | | | | |
| BHBA (μmol/L) | 696.44 | 465.78 | 1.50 | 32.51 | 0.007 |
| Total ketone body (μmol/L) | 716.17 | 487.44 | 1.47 | 36.01 | 0.014 |
| ALP (U/L) | 234.06 | 273.67 | −1.17 | 11.86 | 0.049 |
| **Blood amino acids (nmol/mL)** | | | | | |
| Valine | 227.18 | 282.91 | −1.25 | 7.88 | 0.002 |
| Phenylalanine | 60.22 | 69.01 | −1.15 | 1.30 | 0.003 |
| Threonine | 62.43 | 74.48 | −1.19 | 2.08 | 0.005 |
| Leucine | 134.12 | 163.60 | −1.22 | 4.90 | 0.009 |
| Lysine | 105.49 | 120.96 | −1.15 | 2.81 | 0.010 |
| Serine | 77.44 | 89.57 | −1.16 | 1.90 | 0.011 |
| Tyrosine | 56.11 | 64.18 | −1.14 | 1.63 | 0.014 |
| Histidine | 49.24 | 53.49 | −1.09 | 0.74 | 0.016 |
| Isoleucine | 106.04 | 124.12 | −1.17 | 3.59 | 0.020 |
| Methionine | 30.06 | 33.18 | −1.10 | 0.79 | 0.031 |
| Ornithine | 57.67 | 66.77 | −1.16 | 2.09 | 0.031 |

DMI, dry matter intake; Emmean, estimated marginal means; HME, group of high methane-emission cattle; LME, group of low methane-emission cattle; SEM, standard error of the mean; C2/C3, acetate and propionate ratio; C3, propionate; C4, butyrate; BHBA, beta-hydroxybutyric acid; ALP, alkaline phosphatase.
