# Supplementary material for: Exploring the link between ruminal methane production and physiological resilience in Japanese Black cattle during fattening
Source: Research Square preprint supplement (doi:10.21203/rs.3.rs-5235475/v1), 2024-10-15
Supplement: Supplementary file 2 [file ae7e949ca1974bd084e60be0.docx]

**Table S1.** Growth performance, feed intake, and nutritional composition of Japanese Black cattle during the early, middle, and late fattening periods.

| **Variable** | **T1** | | **T2** | | **T3** | |
| --- | --- | --- | --- | --- | --- | --- |
| **HME** | **LME** | **HME** | **LME** | **HME** | **LME** |
| **Growth performance** | | | | | | |
| Average body weight (kg) | 398.3 (385.5–407.5) | 387.5 (372.0–405.0) | 590.8 (567.0–643.6) | 562.5 (525.9–600.6) | 730.5 (675.7–788.9) | 724.5 (676.9–777.1) |
| Average daily gain (kg/day) | 0.78 (0.45–1.07) | 0.89 (0.84–0.93) | 0.88 (0.70–1.04) | 0.83 (0.69–0.94) | 0.61 (0.52–0.71) | 0.66 (0.59–0.80) |
| **Feed intake (kg/day)** | | | | | | |
| Concentrate | 5.23 (5.06–5.33) | 5.32 (5.30–5.33) | 7.07 (6.02–8.29) | 7.19 (6.24–8.51) | 6.44 (6.02–7.55) | 6.64 (5.24–7.83) |
| Rice straw | 1.27 (0.85–1.70) | 1.39 (0.85–1.70) | 0.70 (0.51–0.95) | 0.80 (0.51–1.02) | 0.61 (0.43–0.79) | 0.68 (0.43–0.79) |
| Kraft pulp feed | 0.44 (0.00–0.85) | 0.29 (0.00–0.85) | 0.23 (0.00–0.51) | 0.15 (0.00–0.46) | 0.22 (0.00–0.44) | 0.14 (0.00–0.37) |
| Dry matter | 6.94 (6.76–7.04) | 7.01 (6.94–7.04) | 8.01 (6.86–9.04) | 8.14 (7.09–9.52) | 7.26 (6.67–8.21) | 7.45 (6.03–8.12) |
| Total digestible nutrients | 5.23 (4.99–5.50) | 5.23 (5.06–5.48) | 6.40 (5.55–7.22) | 6.47 (5.56–7.52) | 5.84 (5.32–6.59) | 5.97 (5.52–7.05) |
| Crude protein | 0.89 (0.87–0.93) | 0.91 (0.89–0.93) | 1.05 (0.87–1.23) | 1.07 (0.94–1.27) | 0.80 (0.72–0.94) | 0.83 (0.65 -0.97) |

T1: Early fattening phase (13 months of age). Concentrates in T1: steam-flaked corn 42%, wheat bran 27%, corn gluten meal 10%, soybean meal 12%, soybean hull 6%, salt 1% (total digestible nutrients (TDN) 71.2%, crude protein (CP) 15.9%); T2: Middle fattening phase (20 months) Concentrates in T2: steam-flaked corn 42%, barley 14%, wheat bran 21%, corn gluten meal 5%, soybean meal 10%, soybean hull 6%, salt 1% (TDN 72.5%, CP 14.4%); T3: Late fattening phase (28 months) Concentrates in T3: steam-flaked corn 44%, barley 25%, wheat bran 14%, soybean meal 5%, soybean hull 10%, salt 1% (TDN 72.8%, CP 12.0%). Rice straw: dry matter (DM) 87.8%, TDN 37.7%, CP 4.7%; Kraft pulp feed: DM 76.9%, TDN 51.1%, CP 0.3%; HME: High methane-emission cattle (n=6); LME: Low methane-emission cattle (n=6). Data sourced from our previous study (Kim *et al.*, 2022).
