# Supplementary material for: Exploring the link between ruminal methane production and physiological resilience in Japanese Black cattle during fattening
Source: Research Square preprint supplement (doi:10.21203/rs.3.rs-5235475/v1), 2024-10-15
Supplement: Supplementary file 3 [file e7b00119cdc6086b33444957.docx]

**Figure S2.** Linear mixed-effect model regression trees for methane emission. Methane emission (L/day) was used as a dependent variable and hepatic genes selected according to mixed effect model analysis (A) and 100% prevalence (B) were used as independent variables. DSCC1, DNA replication and sister chromatid cohesion 1; GORASP2, golgi reassembly-stacking protein 2; OTC, ornithine transcarbamylase; RAB6A, Ras-related protein Rab-6A; RALB, Ras-related protein Ral-B; SLC1A1, solute carrier family 1 member 1 (glutamate transporter).
