# Supplementary material for: Exploring the link between ruminal methane production and physiological resilience in Japanese Black cattle during fattening
Source: Research Square preprint supplement (doi:10.21203/rs.3.rs-5235475/v1), 2024-10-15
Supplement: Supplementary file 4 [file ecc48347a5e9dbecd92a9e8e.docx]

**Figure S1.** Linear mixed-effect model regression trees for methane emission (L/day), using rumen fermentation characteristics (A), blood metabolites (B), and hepatics genes (C) as independent variables. C3, propionate; C4, butyrate; BHBA, beta-hydroxybutyric acid; ALP, alkaline phosphatase.
